# Supplementary material
Source: publisher site journal article supplement (https://www.dovepress.com/article/531799)
Supplement: Supplementary file 1 [file 531799%20%2509Supplementary%20Figures.docx]

**Supplementary Figure 1. Missing value analysis plot.**


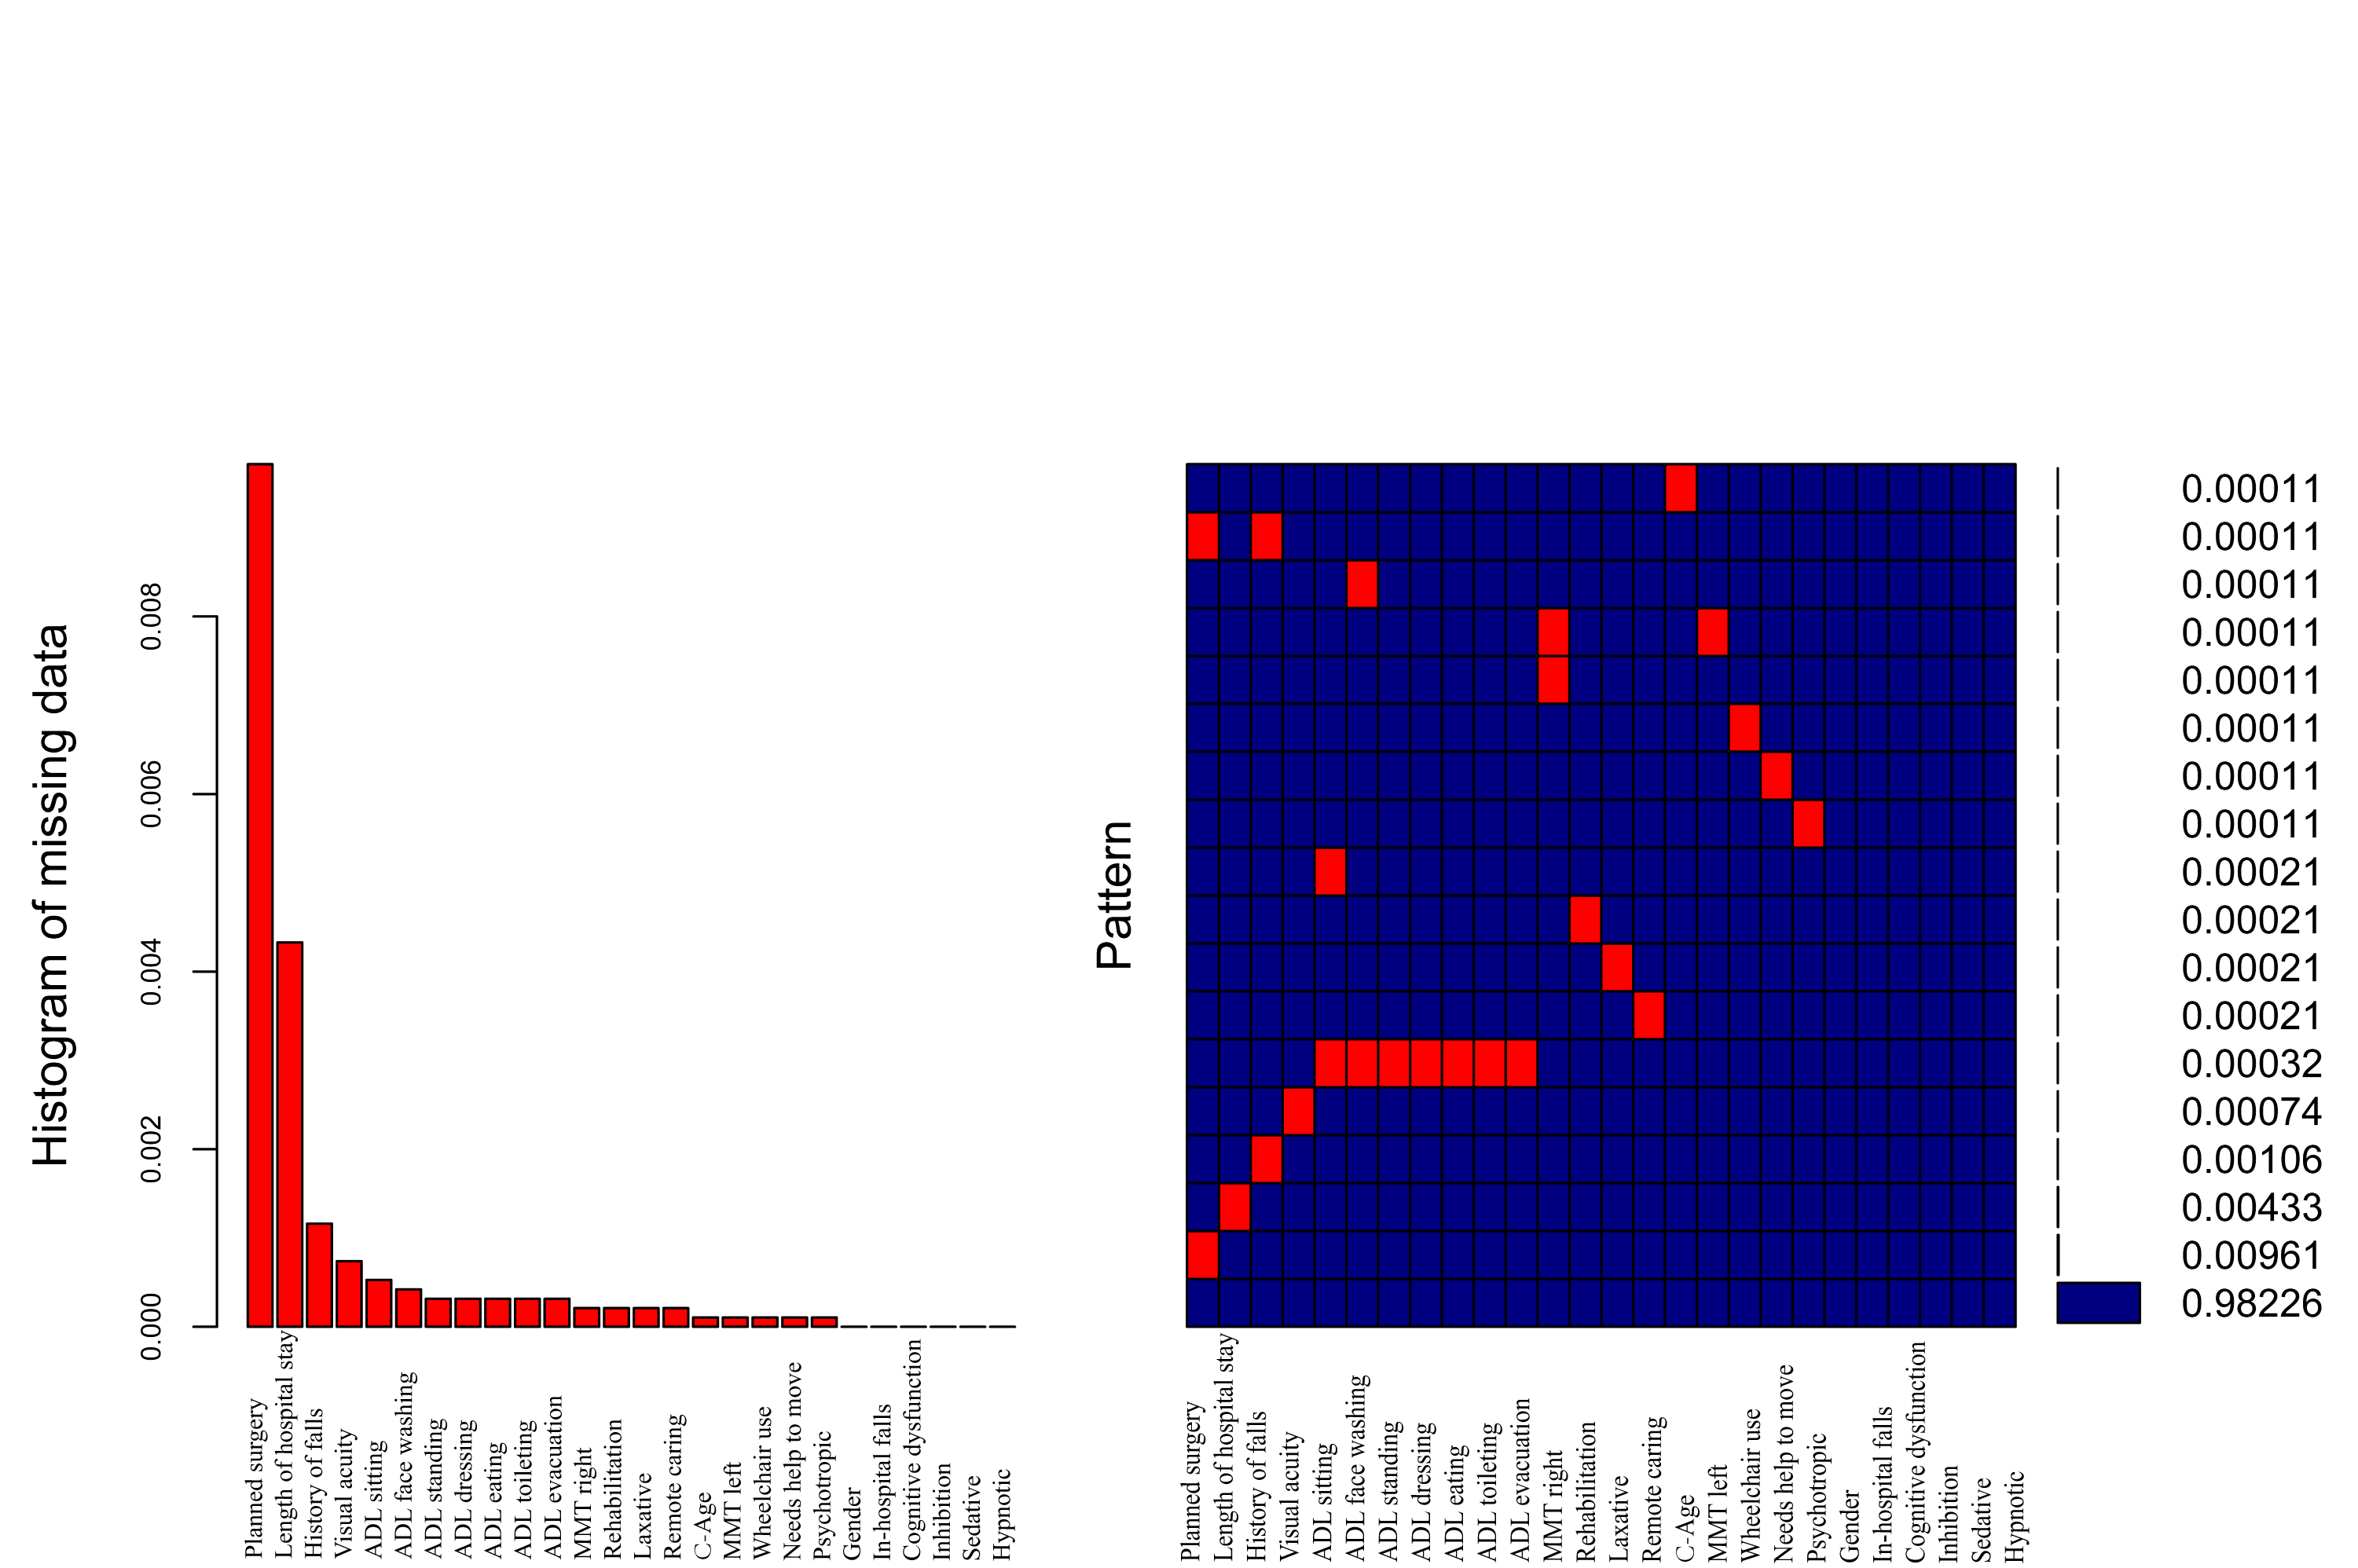


**Supplementary Figure 2. Plot of fitted curves from multiple imputation.**


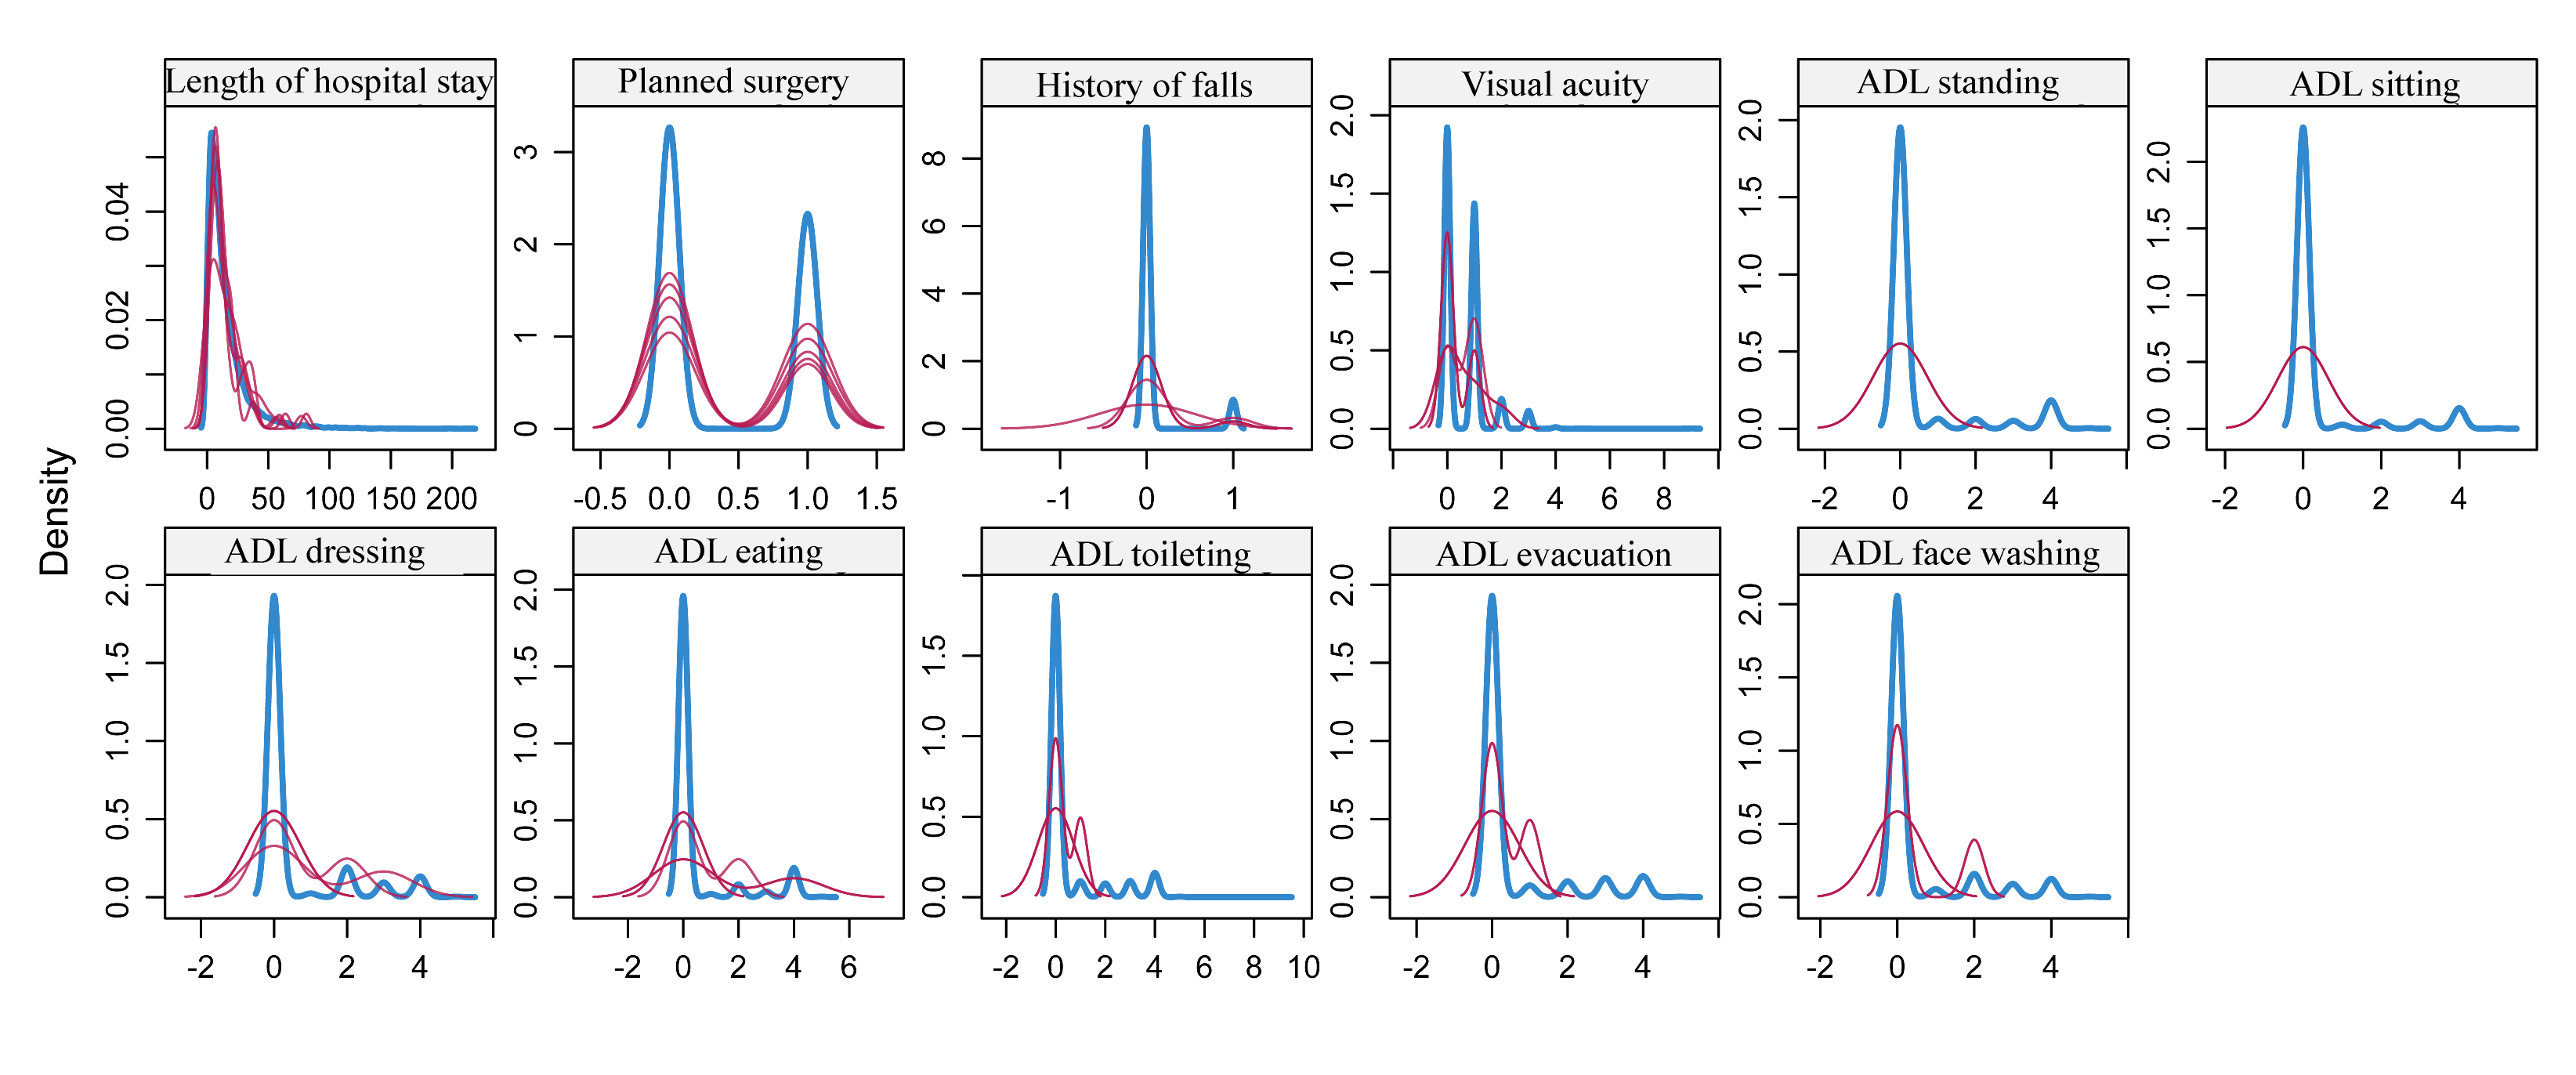


**Supplementary Figure 3. Static nomogram for hospital fall risk prediction.**


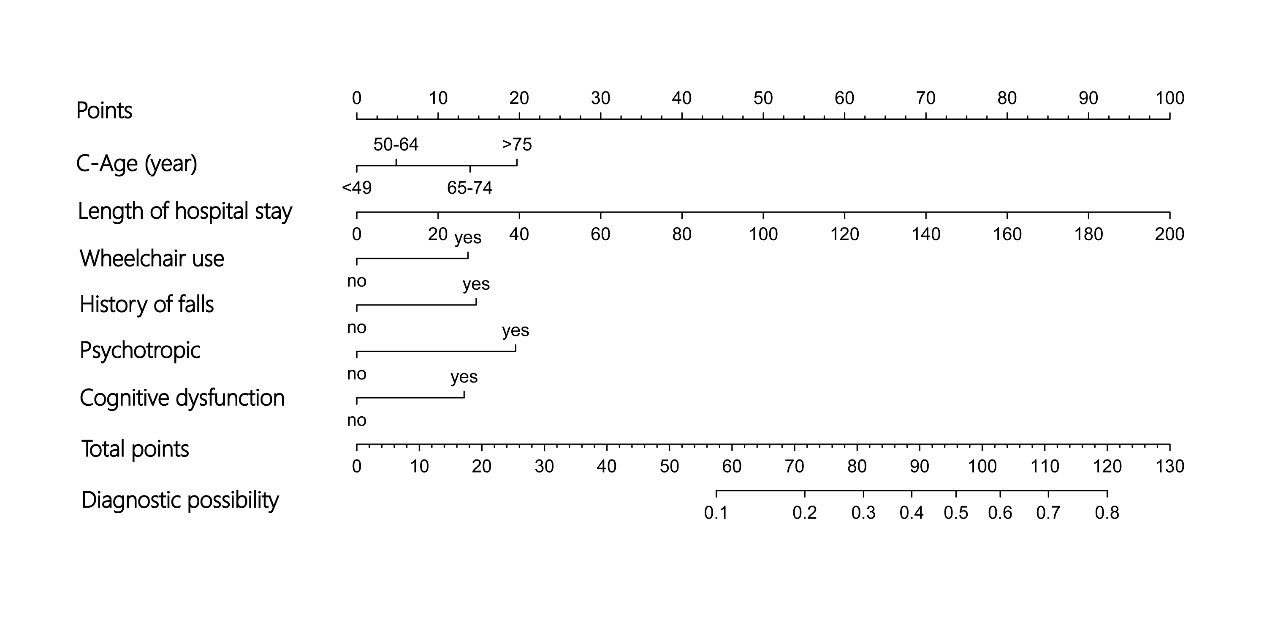


**Supplementary Figure 4.** **Interface of the dynamic nomogram web application for hospital fall risk prediction.**

**
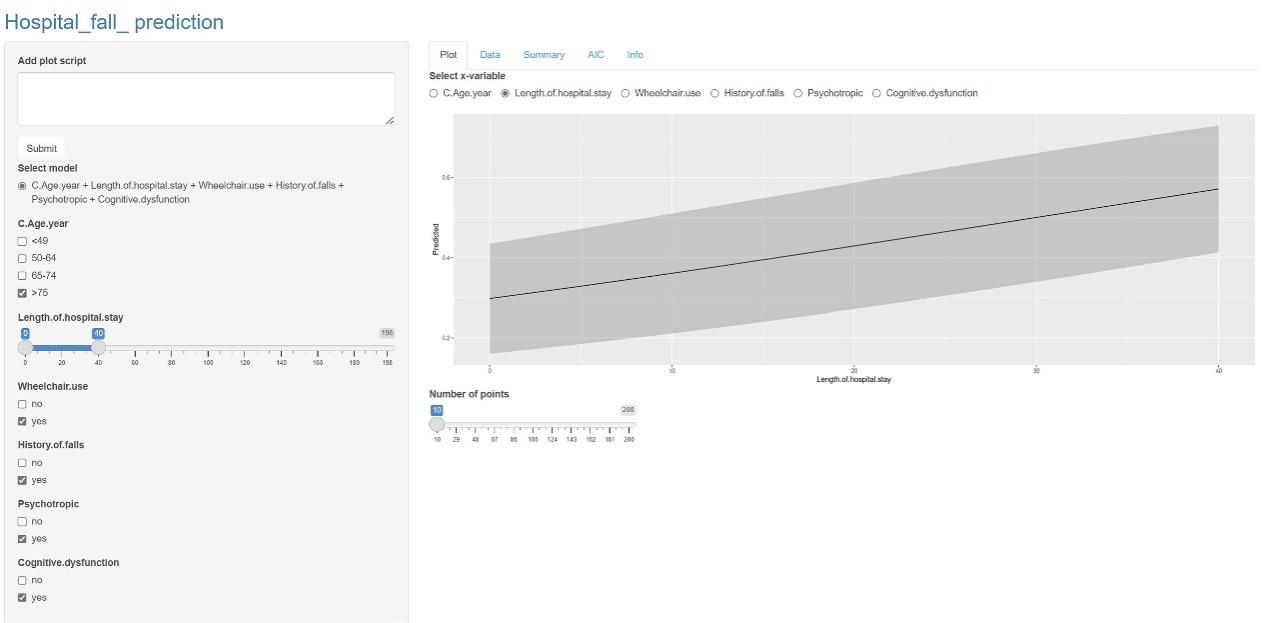
**

The figure shows the predicted probability of an in-hospital fall, as determined by the model, for a patient with the following characteristics: age over 75 years, length of stay of 40 days, wheelchair use, prior history of falls, history of psychotropic medication use, and cognitive impairment.
